# Supplementary material for: Extensive population genetic structure in the giraffe
Source: Springer Nature journal article supplement (doi:10.1186/1741-7007-5-57), 2007-12-01
Supplement: Additional file 1 [file 1741-7007-5-57-s1.doc]

**Additional file 1.** Giraffe sampling localities and sample sizes for mtDNA characterization with resulting mtDNA control region haplotypes.

| Subspecies | **Population/Site** | **n** | **Haplotypes**  **(frequency)** |
| --- | --- | --- | --- |
| **G.c. peralta** **(West African)** | Harikanassou Region, Niger | **22** | 1(15), 2(7) |
| ***G.c. rothschildi* (Rothschild’s)** |  | **51** |  |
|  | Murchison Falls N. P., Uganda | 25 | 10(25) |
|  | Nakuru N. P., Kenya | 14 | 10(7), 11(1), 12(6) |
|  | Ruma, Kenya | 12 | 10(9), 11(1), 12(2) |
| ***G.c. reticulata***  **(Reticulated)** |  | **63** |  |
|  | Ol Jogi, Laikipia, Kenya | 32 | 8(2), 3(12), 4(6), 6(5), 9(1), 5(6) |
|  | Sweetwaters, Laikipia, Kenya | 10 | 3(1), 4(2), 6(6), 7(1) |
|  | Meru N. P., Kenya | 6 | 3(5), 6(1) |
|  | Samburu N. R., Kenya | 15 | 3(2), 4(7), 5(5), 6(1) |
| ***G.c. tippelskirchi***  **(Masai)** |  | **83** |  |
|  | Athi River Ranch, Kenya | 17 | 13(5), 17(2), 18(9), 19(1) |
|  | Chyulu Hills, Kenya | 16 | 13(13), 15(2), 20(1) |
|  | Lobo, Serengeti N. P., Tanzania | 5 | 14(4), 24(1) |
|  | Ndutu, Serengeti N. P., Tanzania | 11 | 14(7), 21(2), 22(2) |
|  | Ngorongoro, Serengeti N. P., Tanzania | 1 | 22(1) |
|  | Seronera, Serengeti N. P., Tanzania | 4 | 14(3), 21(1) |
|  | Varicho, Serengeti N. P., Tanzania | 1 | 23(1) |
|  | Manyara N. P., Tanzania | 9 | 13(5), 14(2), 15(2) |
|  | Lake Naivasha, Tanzania | 6 | 13(4), 15(2) |
|  | Tarangire N. P., Tanzania | 13 | 13(7), 15(1), 16(1), 25(2), 26(2) |
| **G.c. angolensis** **(Angolan)** |  | **35** |  |
|  | Etosha N. P., Namibia | 15 | 29(10), 30(1), 32(2), 33(2) |
|  | Hoanib River, Namibia | 13 | 31(13) |
|  | Hoarsib River, Namibia | 2 | 34(1), 35(1) |
|  | Kamanjab, Namibia | 1 | 30(1) |
|  | Khumib River, Namibia | 4 | 31(3) |
| **G.c. giraffa** **(South African)** |  | **12** |  |
|  | Kruger N. P., South Africa | 11 | 27(11) |
|  | Serondella, Zimbabwe | 1 | 28(1) |
