# Supplementary material for: Extensive population genetic structure in the giraffe
Source: Springer Nature journal article supplement (doi:10.1186/1741-7007-5-57), 2007-12-01
Supplement: Additional file 2 [file 1741-7007-5-57-s2.doc]

**Additional file 2.** Maximum parsimony phylogeny of giraffe (*Giraffa camelopardalis*) mtDNA haplotypes. The phylogeny is a strict consensus of 15 equally-parsimonious trees, rooted with *Okapia johnstoni*. Tree length = 438, consistency index (excluding uninformative characters) = 0.6016, retention index = 0.9050, and 139 parsimony-informative nucleotide changes. Bootstrap values ≥50%, based on 1000 pseudoreplicates, are shown above internodes. Terminal names refer to haplotype numbers and subspecies group.
